# Supplementary material for: NK cells require immune checkpoint receptor LILRB4/gp49B to control neurotropic Zika virus infections in mice
Source: JCI journal article supplement (doi:10.1172/jci.insight.151420), 2022-02-07
Supplement: sd1 [file 1]

You are being redirected.
