# Supplementary material for: NK cells require immune checkpoint receptor LILRB4/gp49B to control neurotropic Zika virus infections in mice
Source: JCI journal article supplement (doi:10.1172/jci.insight.151420), 2022-02-07
Supplement: sd1 [file 1]

## LILRB4 expression

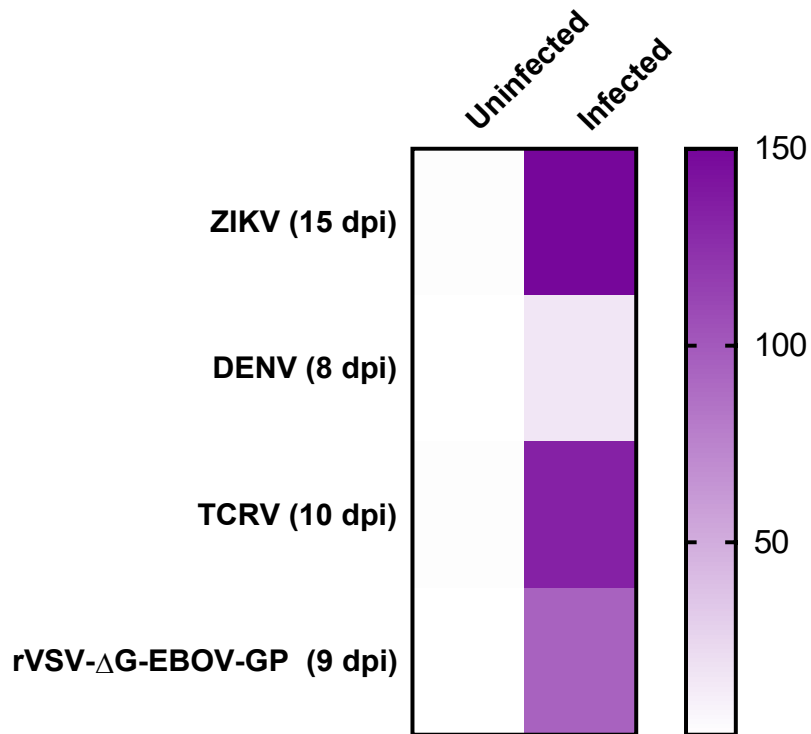

**Supplemental Figure 1. LILRB4 expression in the brain of ZIKV, DENV, TCRV and rVSV-ΔG-EBOV-GP-infected mice.** Heat map shows the fold changes in LILRB4 RNA expression in the brain of ZIKV (15 dpi), DENV (8 dpi), TCRV (10 dpi) and rVSV-ΔG-EBOV-GP (9 dpi)-infected mice relative to uninfected mice with age matched. RNA expression was assessed by NanoString analysis using the nCounter mouse Immunology panel.

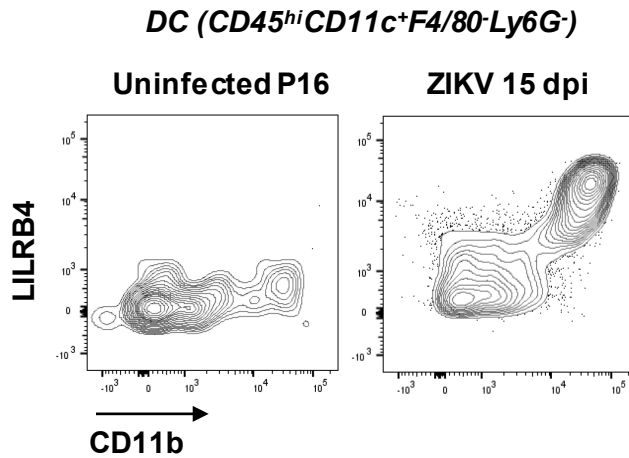

**Supplemental Figure 2. LILRB4 expression is detected on  $CD11b^{+}$  DC in the mouse brain during ZIKV infection.** The phenotype of LILRB4-expressing DCs ( $CD45^{hi}CD11c^{+}F4/80^{-}Ly6G^{-}$ ) was determined by flow cytometry in the brain of uninfected (P16) and ZIKV-infected WT mice at 15 dpi. DCs ( $CD45^{hi}CD11c^{+}F4/80^{-}Ly6G^{-}$ ) were gated and separated based on CD11b and LILRB4 staining. Data are representative of two independent experiments (n=3-5, each time point).

**A**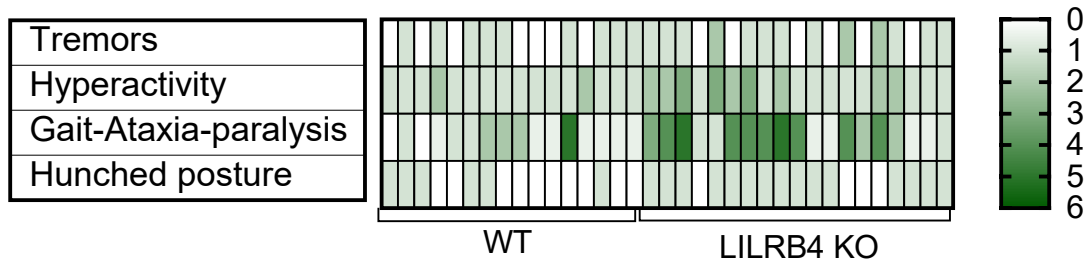**B**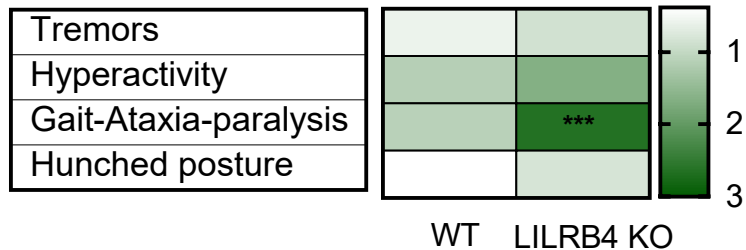

**Supplemental Figure 3. Clinical symptoms in ZIKV-infected WT and LILRB4 KO mice at 15 dpi.** (A and B) Neurological symptoms were determined in ZIKV-infected WT (n=16) and LILRB4 KO mice (n=19) at 15 dpi and scored as follows: Tremors were graded 0 for none, 1 for occasional, 2 for low but constant and 3 for rapid and constant. Hyperactivity was scored 0 for normal, 1 for skittish, 2 for mouse running laps in the cage and 3 for mouse running into walls. Gait-Ataxia-Paralysis was scored 0 of normal, 0.5 for wide stance, 1 for wide stance and poor balance, 2 for gait-neuropathy, 3 for paresis, 4 for paralysis in one leg and 5 for paralysis in both legs. Hunched posture was graded 0 for normal, 1 for present and 2 for if posture impedes normal function. Heat maps visualize clinical scores for individuals (A) or the mean of a group (B). \*\*\* $P < 0.001$

**A**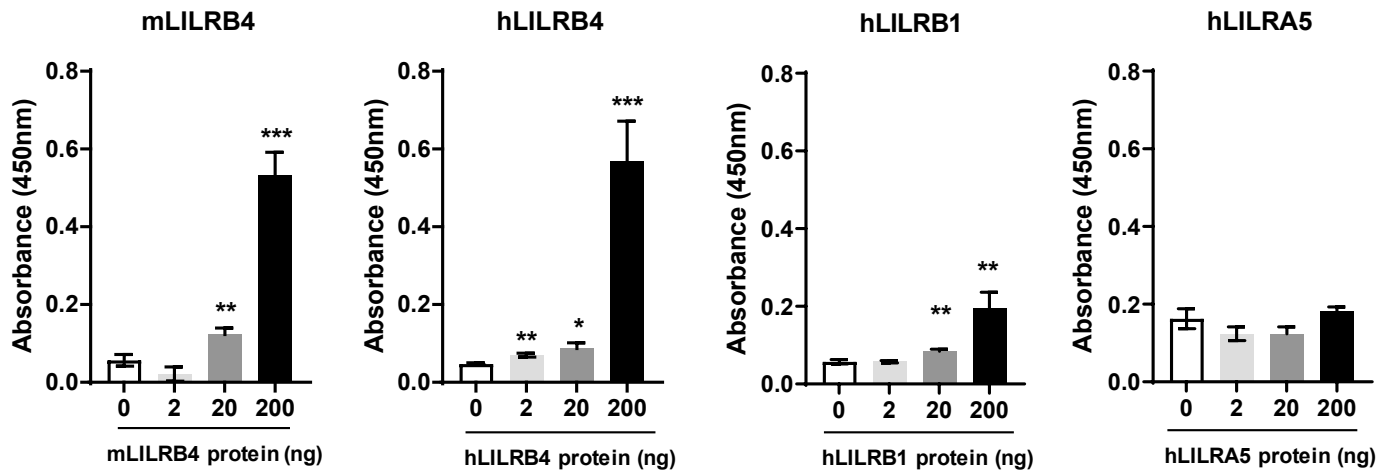**B**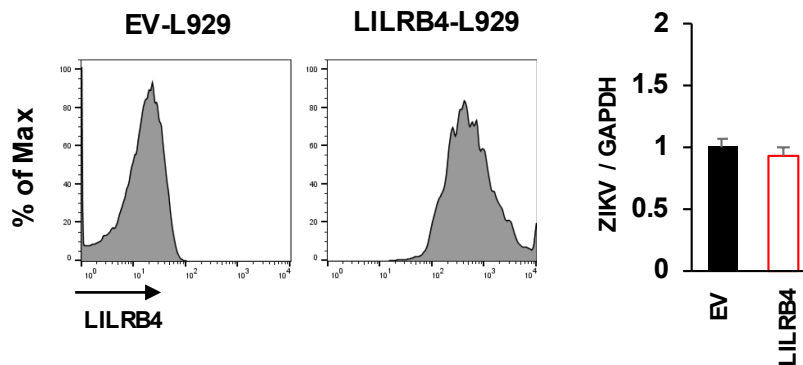

**Supplemental Figure 4. LILRB4 binds to ZIKV but does not promote ZIKV infection. (A)** Binding of ZIKV to mLILRB4, hLILRB4, hLILRB1 and hLILRA5 recombinant proteins. Data are representative of three independent experiments (triplicates, each). \* $P < 0.05$ , \*\* $P < 0.01$ , \*\*\* $P < 0.001$ . **(B)** Mouse fibroblast L929 cells, transduced with empty virus (EV) or lentivirus encoding LILRB4, were infected with ZIKV (MOI 1) for 24 h. Relative quantification of ZIKV RNA copies using Real-time PCR was used to determine relative ZIKV RNA levels normalized with GAPDH. Data shown as means + S.D of three independent experiments.

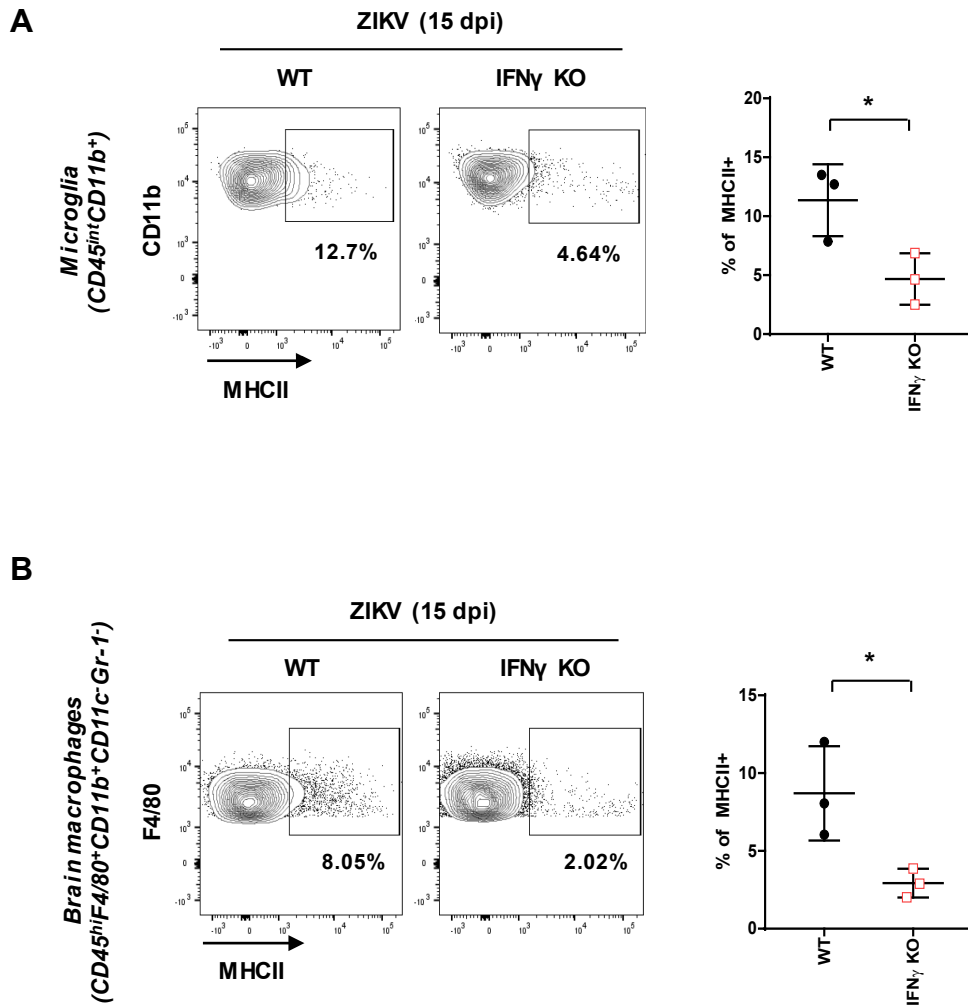

**Supplemental Figure 5. Impaired activation of microglia and brain macrophages in ZIKV-infected IFN $\gamma$  KO mice.** Flow cytometry analysis of MHCII-positive microglia (A) and macrophages (B) in the brain of ZIKV-infected WT and IFN $\gamma$  KO mice at 15 dpi. The graphs show the percentage of MHCII<sup>+</sup> cells in microglia (CD45<sup>int</sup>CD11b<sup>+</sup>) (A) and macrophages (CD45<sup>hi</sup>CD11b<sup>+</sup>F4/80<sup>+</sup>) (B), respectively.

**A****Naïve splenic T cells ( $CD45^{hi}CD3^{+}NK1.1^{-}$ )**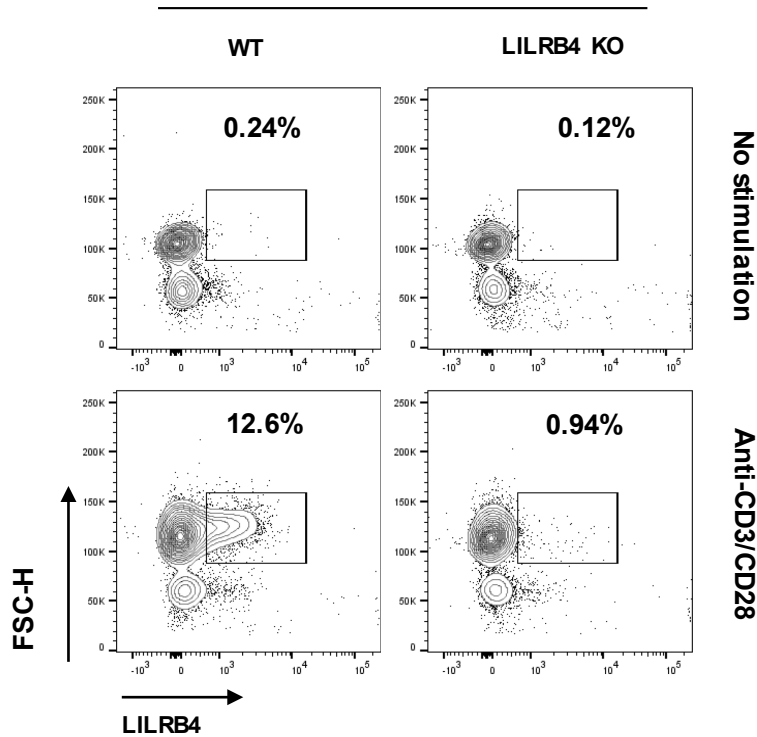**B****Naïve LILRB4<sup>+</sup> splenic T cells ( $CD45^{hi}CD3^{+}NK1.1^{-}LILRB4^{+}$ )**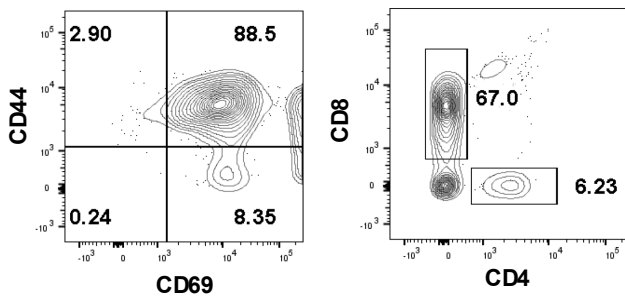**C****Naïve splenic CD8 T cells ( $CD45^{hi}CD3^{+}CD8^{+}NK1.1^{-}$ )**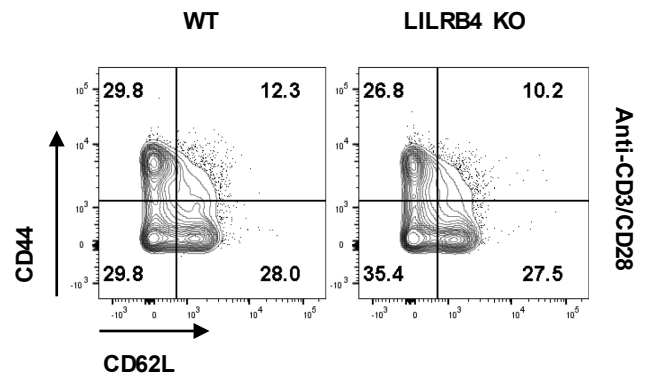

**Supplemental Figure 6. Activated CD8 splenic T cells express LILRB4.** (A-C) T cells were isolated from the spleen of naïve WT and LILRB4 KO mice at P16, and then stimulated with Dynabeads mouse T-Activator CD3/CD28 for 24 h. T cells ( $CD45^{+}CD3^{+}NK1.1^{-}$ ) were separated based on LILRB4 expression. The plots show representative results of the percentage of LILRB4-expressing cells in T cells (A). T cell subtypes were determined by CD44, CD62L, CD4 and CD8 staining within LILRB4<sup>+</sup> T cells (B). T cell phenotype was determined by CD44 and CD62L expression within CD8<sup>+</sup> T cells (C). Data are representative of two independent experiments.

**Brain CD8 T cells ( $CD45^{hi}CD3^{+}CD8^{+}NK1.1^{-}$ )**

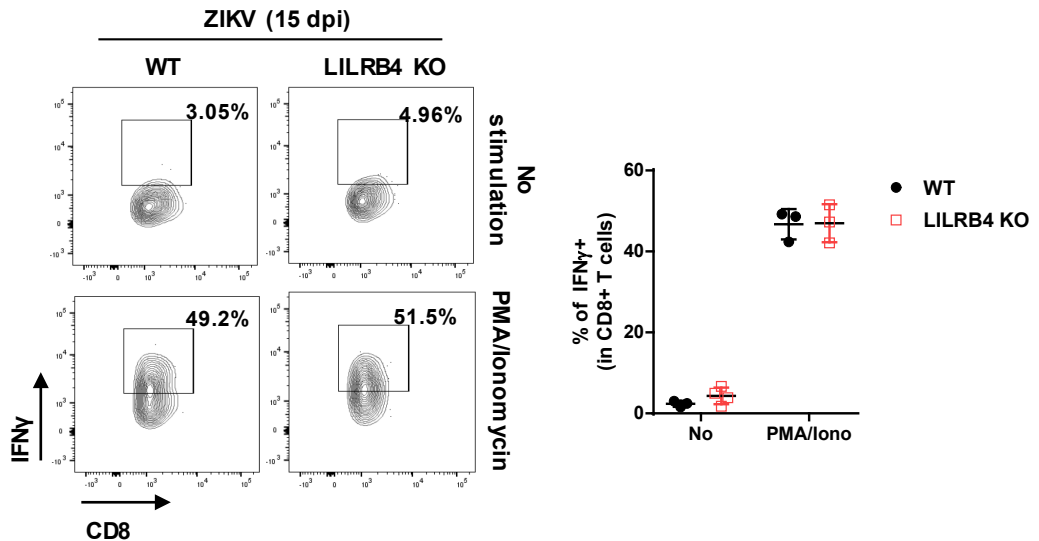

**Supplemental Figure 7. LILRB4 is not critical for regulating IFN $\gamma$  production by CD8 T cell during ZIKV infection.** Cells were isolated from the brain of ZIKV-infected WT and LILRB4 KO mice at 15 dpi, and then incubated with brefeldin A (10  $\mu$ g/mL) with or without PMA (10 ng/mL) and ionomycin (1  $\mu$ g/mL) for 3.5 h. The intracellular expression of IFN $\gamma$  was determined by flow cytometry in CD8 T cells ( $CD45^{hi}CD3^{+}CD8^{+}NK1.1^{-}$ ). The graphs show the percentages of CD8 T cells expressing IFN $\gamma$ .

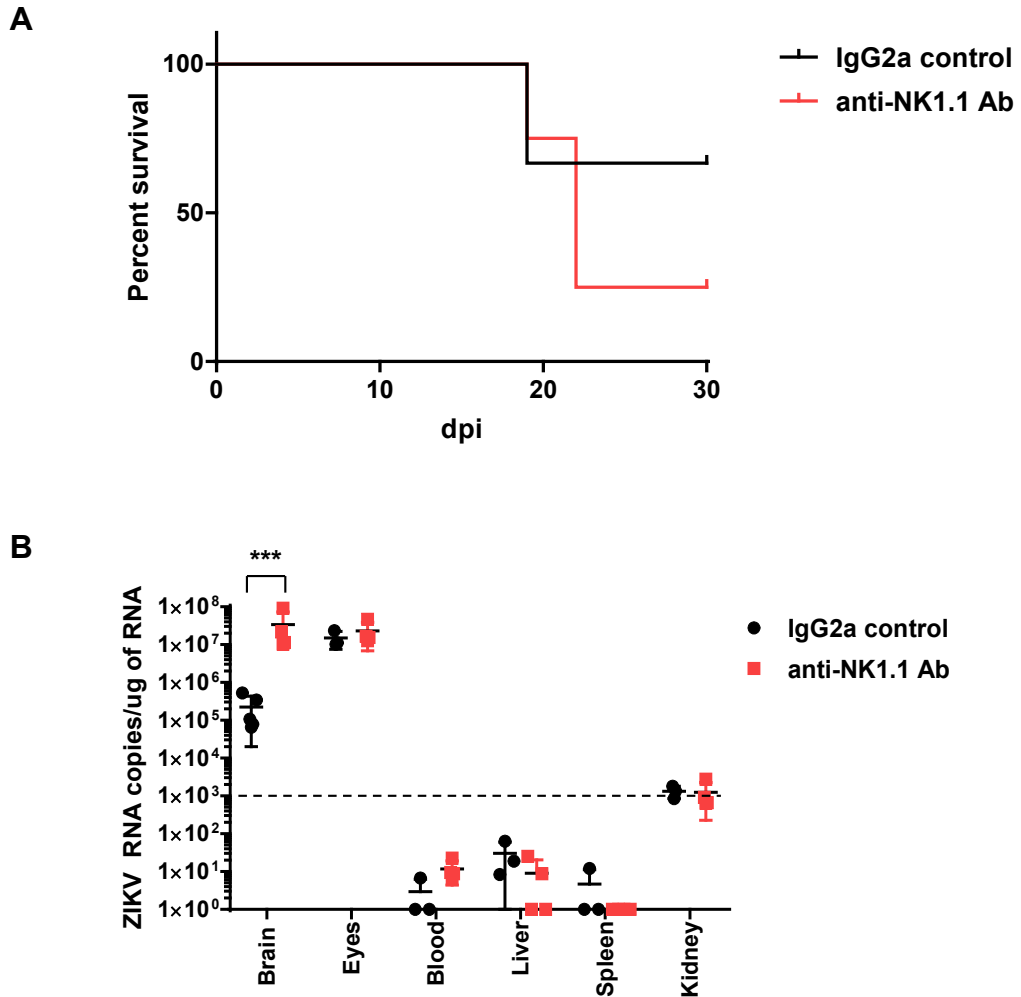

**Supplemental Figure 8. NK cells are important for protecting mice from ZIKV-induced disease. (A and B)** P1 WT mice were challenged with 1000 TCID<sub>50</sub>/mL of ZIKV. From 3 dpi, 25  $\mu$ g of IgG2a or anti-NK1.1 Abs were i.p. injected to ZIKV-infected WT mice every three days, and the survival was monitored for 30 days (n=3-4) (A). Quantification of ZIKV RNA copies using real-time PCR was performed in the brain, eye, blood, liver, spleen, and kidney at 15 dpi (n=3-4) (B).



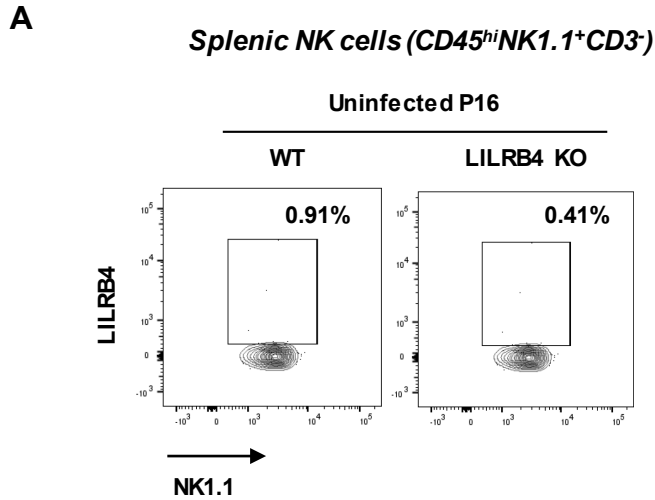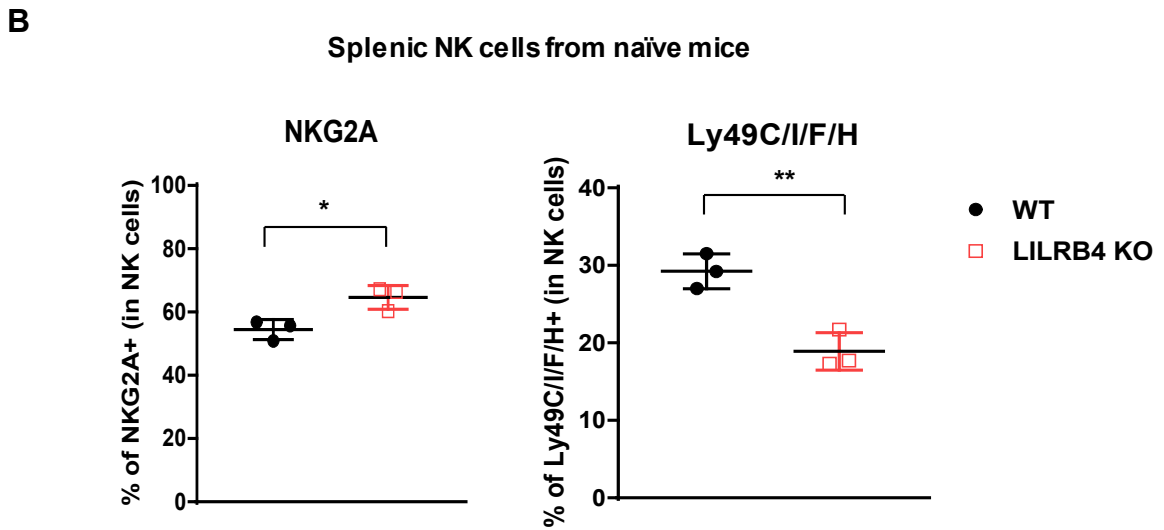

**Supplemental Figure 9. Resting NK cells do not exhibit LILRB4 expression. (A and B)** Splenocytes were isolated from naïve WT and LILRB4 KO mice at P16. Flow cytometry analysis determined the expression of LILRB4 (A), NKG2A and Ly49C/I/F/H (B) on NK cells ( $CD45^{hi}NK1.1^{+}CD3^{-}$ ). Data are representative of two independent experiments.

**A**

Spleen

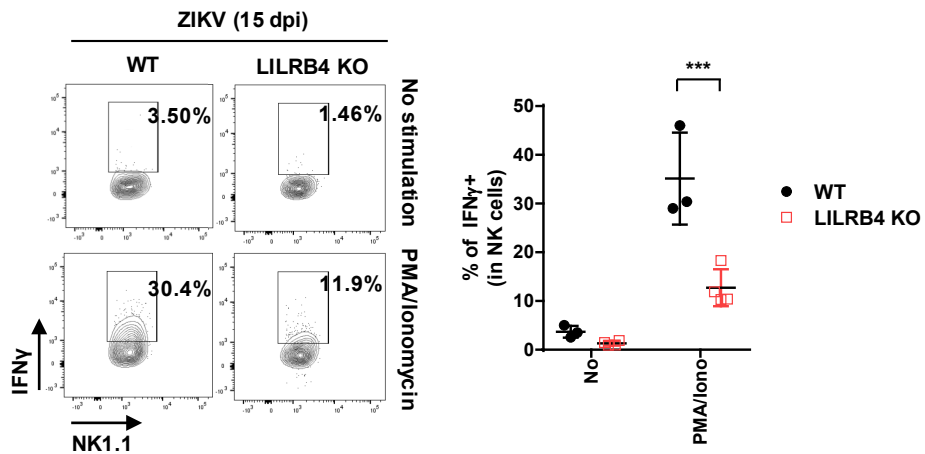**B**

Spleen

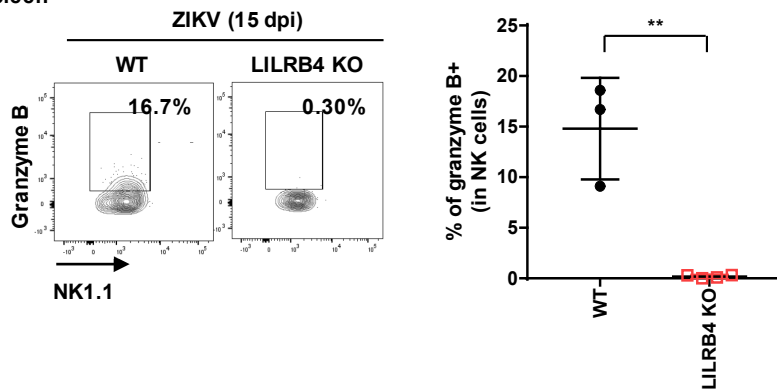

**Supplemental Figure 10. LILRB4 deficiency impairs IFN $\gamma$  and granzyme B production by splenic NK cells upon ZIKV challenge.** (A and B) Cells were isolated from the spleen of ZIKV-infected WT and LILRB4 KO mice at 15 dpi, and then incubated with brefeldin A (10  $\mu$ g/mL) with or without PMA (10 ng/mL) and ionomycin (1  $\mu$ g/mL) for 3.5 h. The intracellular expression of IFN $\gamma$  (A) and granzyme B (B) was determined by flow cytometry in NK cells (CD45<sup>hi</sup>NK1.1<sup>+</sup>CD3<sup>-</sup>). The graphs show the percentages of NK cells expressing IFN $\gamma$  (A) and granzyme B (B).

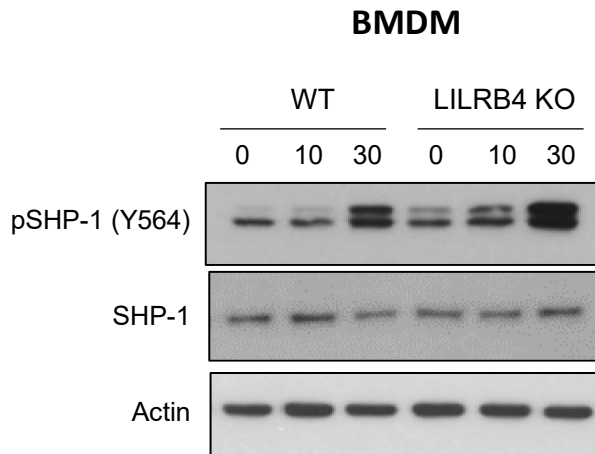

**Supplemental Figure 11. LILRB4 deficiency upregulates SHP-1 phosphorylation in response to ZIKV.** BMDM from WT or LILRB4 KO mice were incubated with ZIKV (MOI 1) for the indicated time. The levels of phosphorylated (Y564) and total SHP-1 were detected by Western blot analysis. Actin was used as an equal loading control for normalization. Data are representative of two independent experiments.

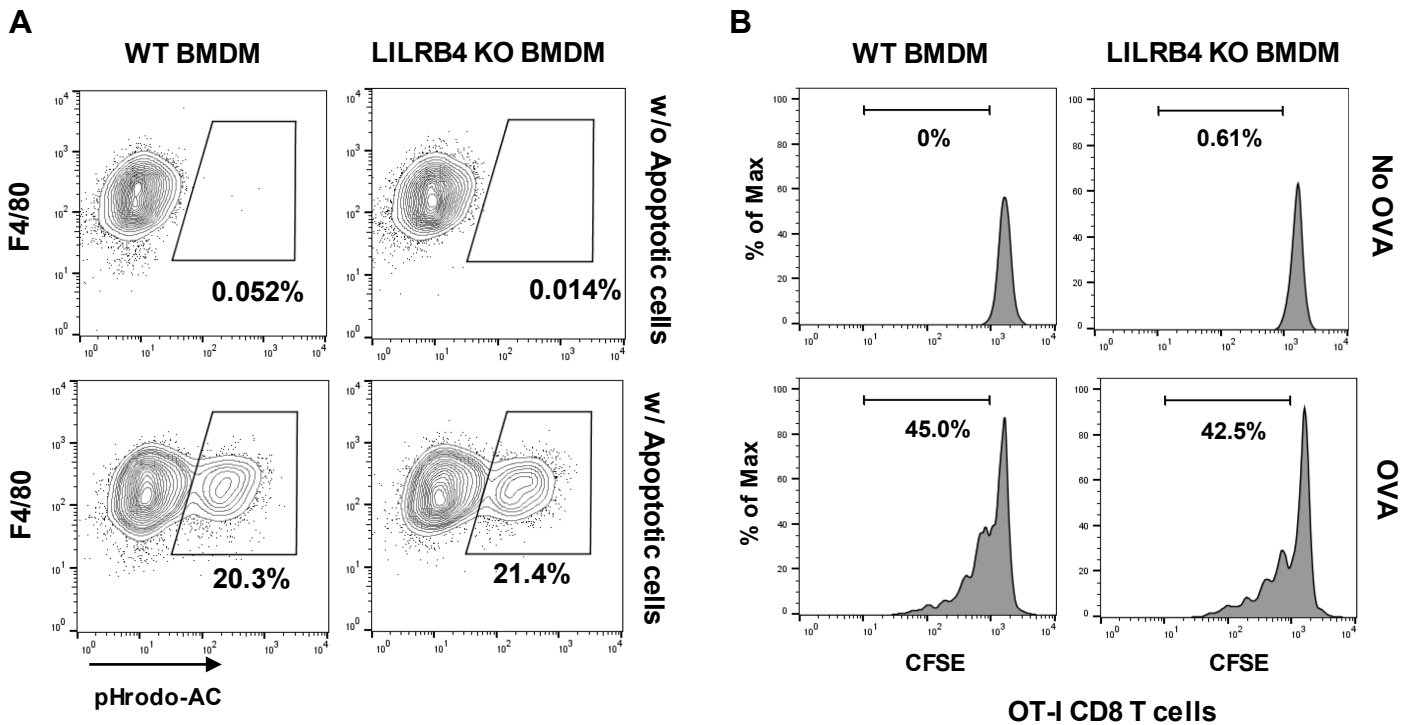

**Supplemental Figure 12. LILRB4 deficiency does not affect phagocytic and antigen-presenting ability of macrophages. (A)** BMDM from WT or LILRB4 KO mice were incubated with pHrodo-labeled apoptotic thymocytes at a 1:3 ratio and, after 60 min, the phagocytosis of apoptotic cells (AC) by F4/80<sup>+</sup> macrophages was determined by flow cytometry. The plots show representative results of the percentage of macrophages that engulfed AC (F4/80<sup>+</sup>pHrodo<sup>+</sup> cells). **(B)** Proliferation of CFSE-labeled OT-I CD8<sup>+</sup> T cells upon co-incubation with ovalbumin (OVA)-loaded apoptotic thymocytes and BMDM isolated from WT or LILRB4 KO mice for 4 days. The histograms illustrate representative results of CFSE dilution.

**A**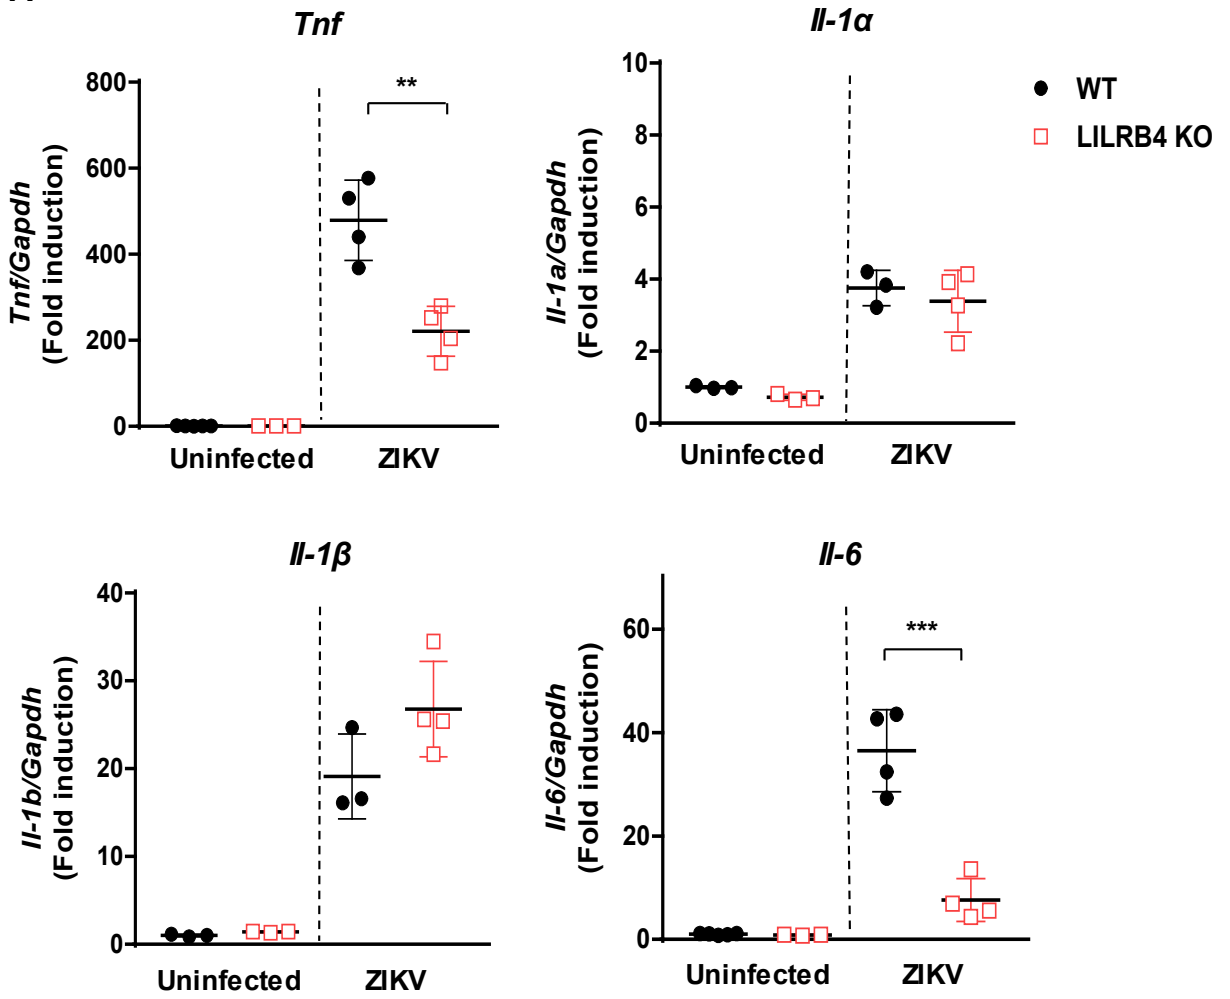**B**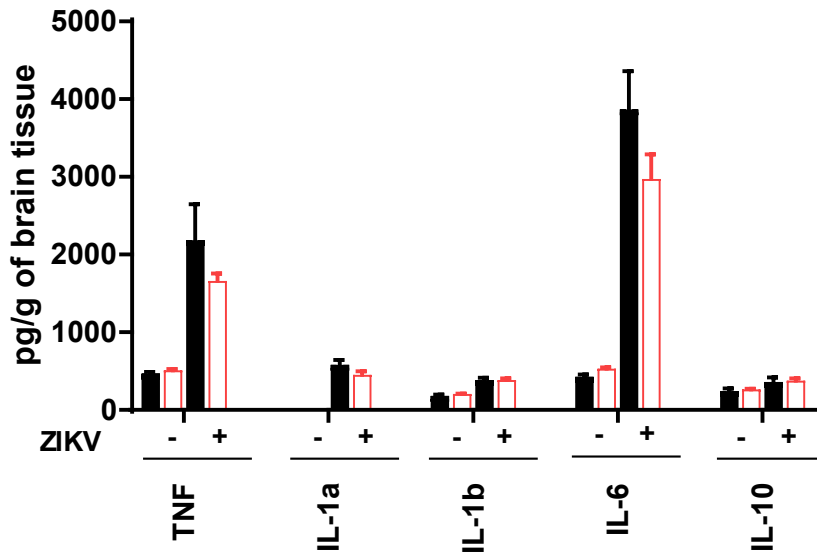

**Supplemental Figure 13. LILRB4 deficiency does not result in increased pro-inflammatory cytokine production.** (A) *Tnf*, *Il-1 $\alpha$* , *Il-1 $\beta$*  and *Il-6* mRNA levels were determined in the brain of uninfected or ZIKV-infected WT and LILRB4 KO mice at 15 dpi using real-time RT PCR. (B) TNF, IL-1 $\alpha$ , IL-1 $\beta$ , IL-6 and IL-10 protein levels were determined in the brain lysates from uninfected or ZIKV-infected WT and LILRB4 KO mice at 15 dpi using luminex. Data shown as means  $\pm$  S.D. (n=2-4). \*\* $P < 0.01$ , \*\*\* $P < 0.001$

**A**

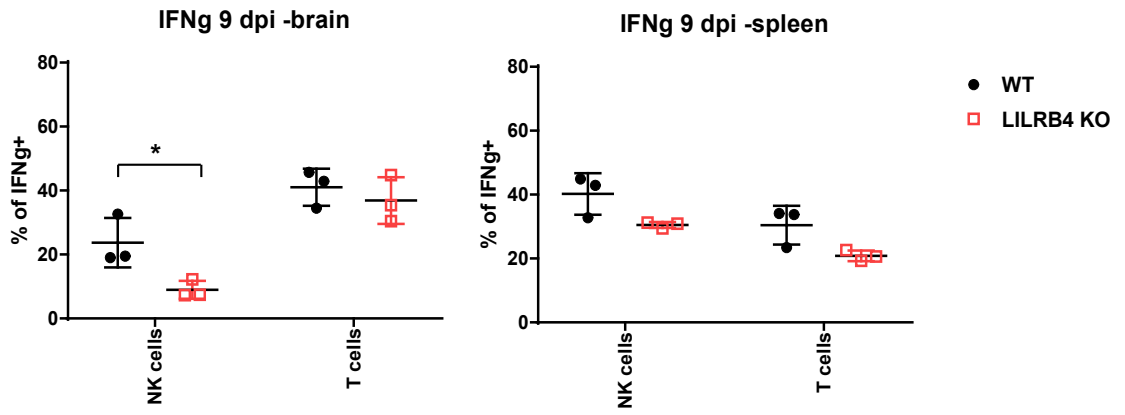

**B**

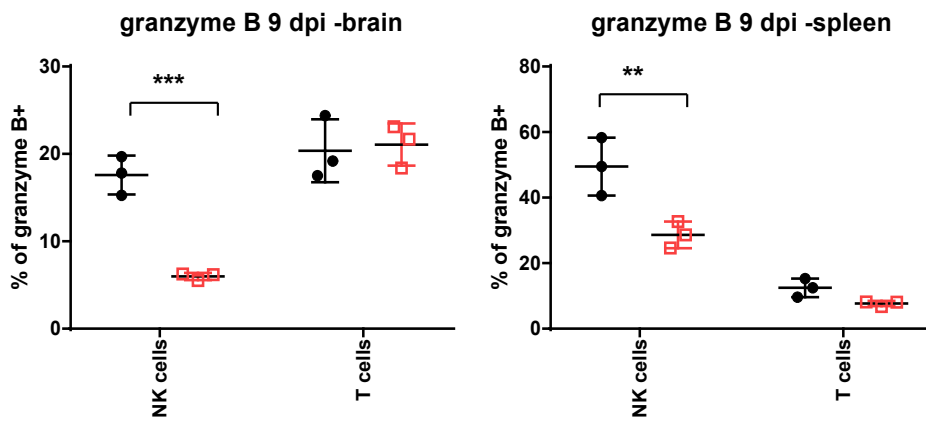

**C**

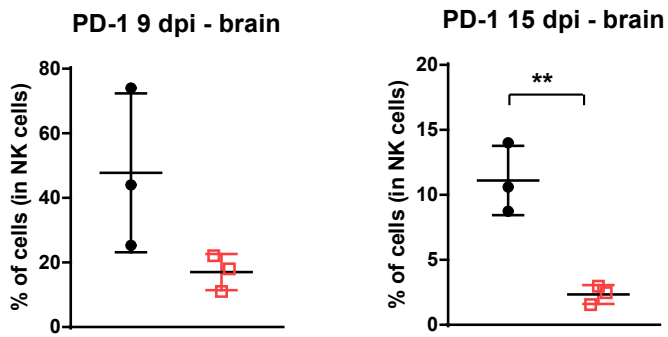

**Supplemental Figure 14. Less IFN $\gamma$  and granzyme B expression by NK cells is not due to exhaustion.** (A) Cells were isolated from the brain and spleen of ZIKV-infected WT and LILRB4 KO mice at 9 dpi, and then incubated with brefeldin A (10  $\mu$ g/mL) with or without PMA (10 ng/mL) and ionomycin (1  $\mu$ g/mL) for 3.5 h. The intracellular expression of IFN $\gamma$  was determined by flow cytometry in NK cells (CD45<sup>hi</sup>NK1.1<sup>+</sup>CD3<sup>-</sup>) and T cells (CD45<sup>hi</sup>CD3<sup>+</sup>NK1.1<sup>-</sup>). The graphs show the percentages of NK and T cells expressing IFN $\gamma$ . (B) Cells were isolated from the brain and spleen of ZIKV-infected WT and LILRB4 KO mice at 9 dpi, and then incubated with brefeldin A (10  $\mu$ g/mL) for 3.5 h. The intracellular expression of granzyme B was determined by flow cytometry in NK cells (CD45<sup>hi</sup>NK1.1<sup>+</sup>CD3<sup>-</sup>) and T cells (CD45<sup>hi</sup>CD3<sup>+</sup>NK1.1<sup>-</sup>). The graphs show the percentages of NK and T cells expressing granzyme B. (C) Cells were isolated from the brain of ZIKV-infected WT and LILRB4 KO mice at 9 and 15 dpi, and the expression of PD-1 was determined by flow cytometry in NK cells (CD45<sup>hi</sup>NK1.1<sup>+</sup>CD3<sup>-</sup>). The graphs show the percentages of NK cells expressing PD-1. Data are representative of three independent experiments (n =3, each). \* $P < 0.05$ , \*\* $P < 0.01$ , \*\*\* $P < 0.001$
